# Supplementary material for: Life in the flow: unique adaptations for feeding on drifting zooplankton in garden eels
Source: Oxford University Press journal article supplement (doi:10.1242/jeb.179523), 2018-01-01
Supplement: jeb179523supp.pdf [file jeb179523supp.pdf]

## Supplementary Information

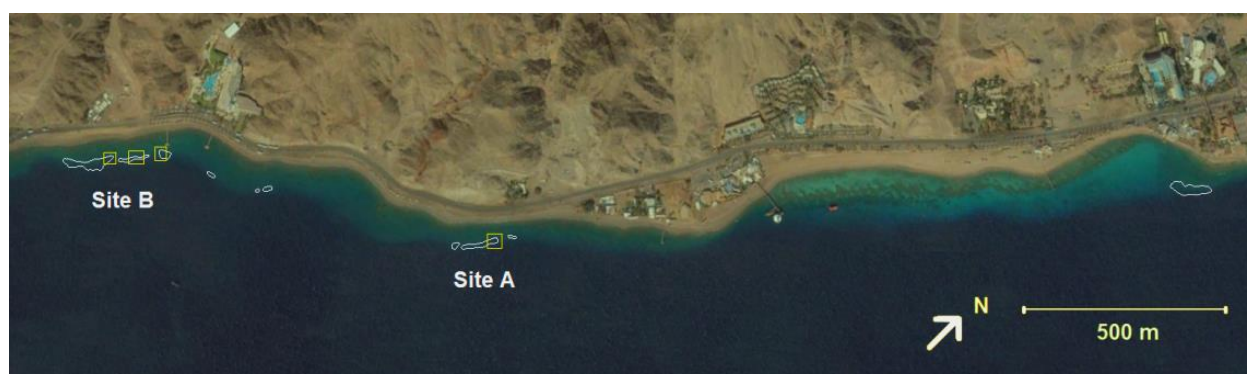

**Figure S1.** An aerial photograph of the southern coast of Eilat, showing the two study sites (A and B). Light polygons indicate a permanent location of a colony. Yellow rectangles indicate locations of video records performed. Site A - offshore from the lighthouse ~0.4 km southwest of the Interuniversity Institute for Marine Sciences in Eilat. At this site the colony occupied a stretch of slope 6 m to 12 m in depth, 92 m in length. Site B - ~0.7 km N.NE of Taba border crossing. At this site the colony was found on a slope between 5 m – 15 m, 233 m in total length, quasi-separated to three sub-groups. The density of eels at Site A was about half that of Site B ( $1.75 \pm 0.48$  and  $3.9 \pm 0.57$  individuals/m<sup>2</sup>, respectively).

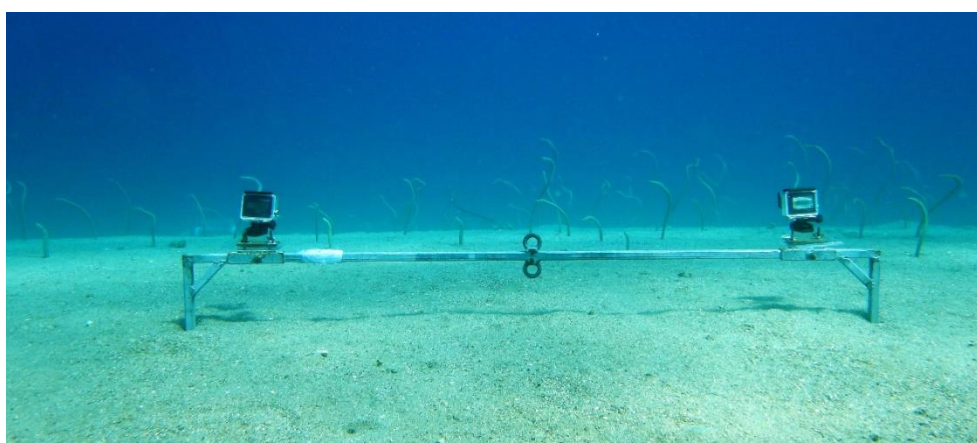

**Figure S2.** The underwater experimental setup. A stereo cameras system (two GoPro cameras, 2704x1524 pixels, 29.97 fps) for extracting three dimensional position data. The cameras were 1.8m apart, attached to a stand inserted in the sand. The cameras are directed towards a colony of garden eels at depth of 6 m.

**Table S1:** List of sessions recorded during the study and the sections within used

| Date       | Time          | Location | Number of sections | Current speed range (cm/s) |    |
|------------|---------------|----------|--------------------|----------------------------|----|
| 16/02/2016 | 06:25 – 07:22 | Site A   | 4                  | 3.3 – 7.0                  |    |
| 18/05/2016 | 15:40 – 16:44 | Site B   | 8                  | 3.5 – 9.6                  |    |
| 02/08/2016 | 08:29 – 09:26 | Site A   | 4                  | 5.4 – 24.1                 | *  |
| 09/08/2016 | 12:26 – 13:26 | Site A   | 9                  | 6.7 – 14.4                 |    |
| 22/08/2016 | 09:02 – 09:56 | Site A   | 7                  | 14.2 – 19.2                |    |
| 23/08/2016 | 10:04 – 10:48 | Site A   | 7                  | 24.1 – 29.9                |    |
| 05/09/2016 | 09:48 – 10:44 | Site A   | 7                  | 14.3 – 16.9                |    |
| 21/09/2016 | 12:26 – 12:41 | Site A   | 2                  | 20.6 – 22.4                | ** |
| 20/10/2016 | 10:59 – 11:55 | Site A   | 10                 | 14.9 – 19.9                |    |
| 20/12/2016 | 13:49 – 14:44 | Site B   | 8                  | 3.1 – 9.0                  |    |
| 26/12/2016 | 07:59 – 08:55 | Site B   | 2                  | 4.8 – 8.6                  |    |

\* Only two eels were analyzed in this session due to camera field of view limitations. The section with the current speed of 5.4 cm/s is shorter (01:07min) but was included in the analysis as it represents a significant change in the current speed during this session and allows examination of the same individuals at different current speeds.

\*\* Shorter session was recorded due to camera failure.

**Table S2:** List of feeding rate experiments

| <b>Date</b> | <b>Time</b> | <b>Current Speed (cm/s)</b> | <b>Plankton Density (Prey/m<sup>3</sup>)</b> | <b>Number of eels examined</b> |
|-------------|-------------|-----------------------------|----------------------------------------------|--------------------------------|
| 14/10/2014  | 11:30       | 9.4                         | 492.7                                        | 10                             |
| 19/10/2014  | 18:00       | 3.9                         | 323.7                                        | 10                             |
| 22/10/2014  | 07:50       | 10.0                        | 1227.0                                       | 10                             |
| 04/11/2014  | 14:10       | 7.8                         | 136.4                                        | 10                             |
| 12/11/2014  | 13:15       | 6.3                         | 69.902                                       | 10                             |
| 10/12/2014  | 11:20       | 20.7                        | 1176.7                                       | 10                             |
| 21/12/2014  | 10:55       | 5.0                         | 168.2                                        | 10                             |
| 23/12/2014  | 10:10       | 14.2                        | 1080.8                                       | 10                             |
| 31/12/2014  | 13:25       | 14.7                        | 1018.2                                       | 10                             |
| 04/07/2017  | 08:30       | 9.1                         | 21.8                                         | 29                             |
| 05/07/2017  | 07:00       | 8.5                         | 85.5                                         | 32                             |
| 06/07/2017  | 07:50       | 7.9                         | 29.9                                         | 17                             |
| 11/07/2017  | 18:00       | 8.2                         | 25.9                                         | 31                             |
| 12/07/2017  | 08:00       | 6.7                         | 95.2                                         | 29                             |
| 13/07/2017  | 08:00       | 3.9                         | 206.8                                        | 30                             |
| 18/07/2017  | 07:55       | 9.4                         | 54.1                                         | 23                             |
| 19/07/2017  | 07:55       | 18.9                        | 110.6                                        | 31                             |
| 20/07/2017  | 07:55       | 11.7                        | 37.9                                         | 29                             |
| 25/07/2017  | 08:20       | 7.1                         | 132.0                                        | 10                             |
| 26/07/2017  | 08:10       | 5.3                         | 51.6                                         | 16                             |
| 27/07/2017  | 07:50       | 3.8                         | 51.7                                         | 13                             |

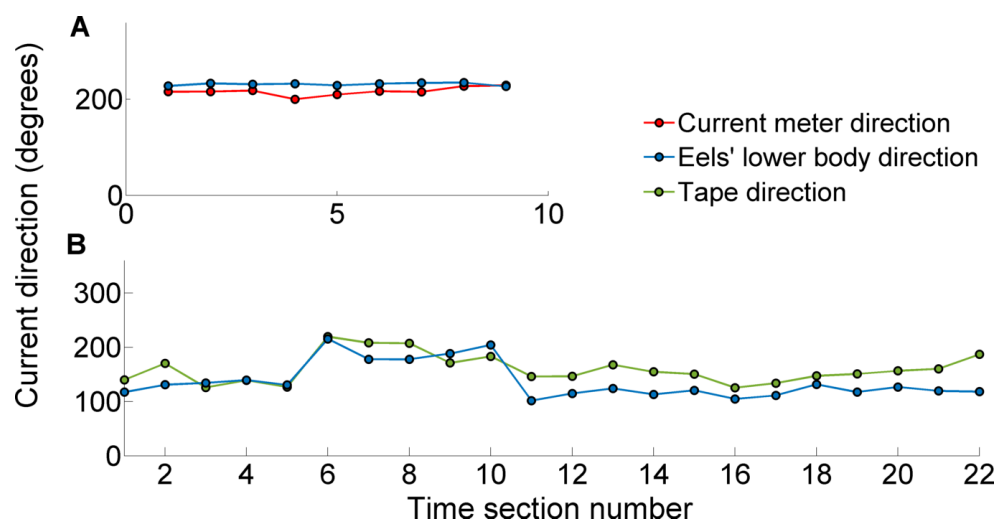

**Figure S3.** Comparison between the current direction calculated based on the inclination of the eel's lower body (10-20 cm from the burrow) and **(A)** current meter measurements under conditions of medium current speed (6.5-15 cm/s) and **(B)** measurements of the direction of a tape attached to a pole ~0.2 m above bottom for current speeds <6.5 cm/s. Each data point indicates the average direction of 3 individual eels each measured every 10 s during 3.5 min interval.

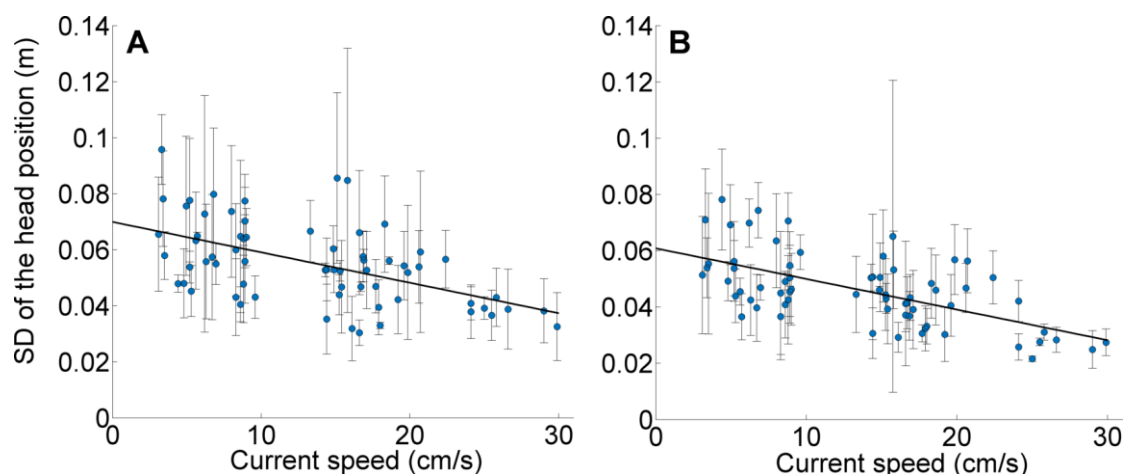

**Figure S4.** Standard deviation of the time varying position of the eels' head along: **(A)** horizontal axis perpendicular to the flow direction ( $R^2=0.28$ ,  $N=66$ ), and **(B)** vertical axis ( $R^2=0.37$ ,  $N=67$ ). Each data point indicates the average for the three eels in a section 3.5 min long. Error bars indicate the standard deviation among the three eels.

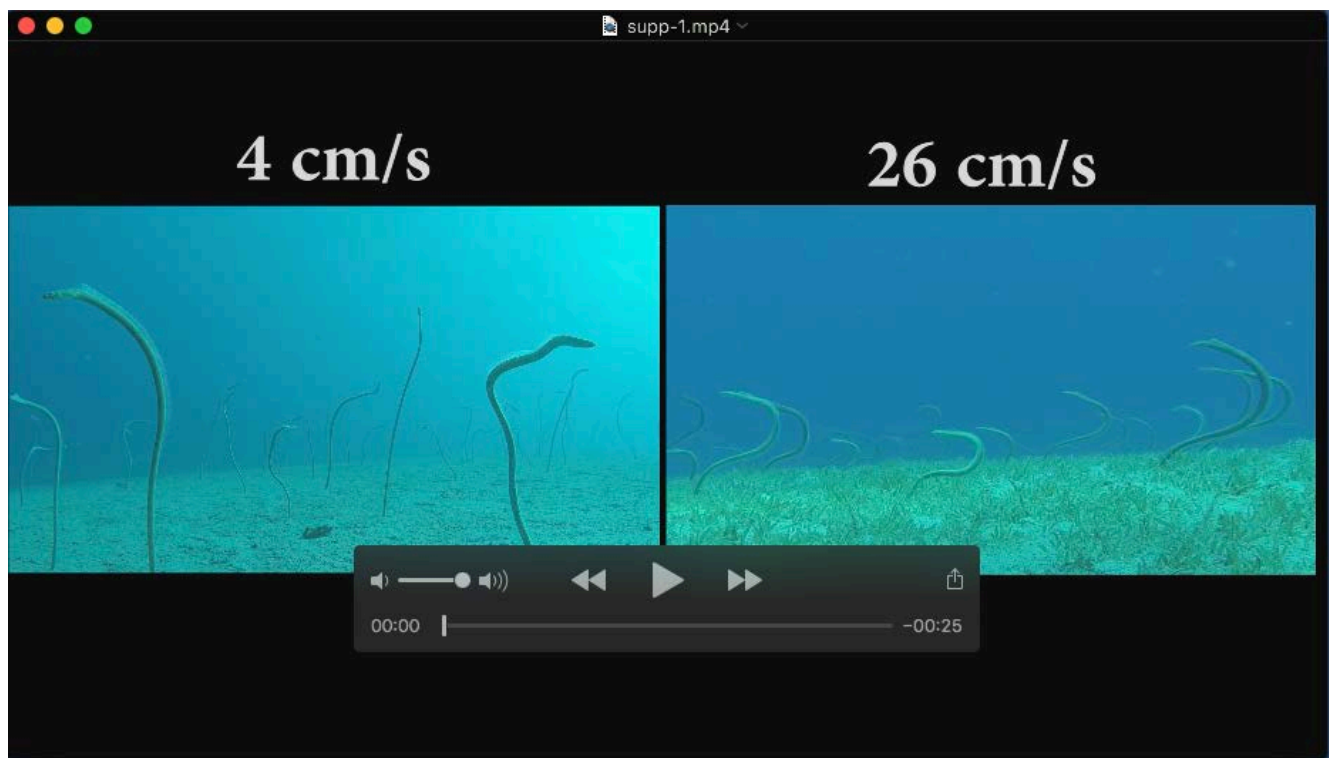

**Movie 1. The flow-dependent changes in the feeding postures of the garden eel *Gorgasia sillneri*.** A garden eel colony at 6 m depth in the northern Gulf of Eilat (Aqaba), Red Sea under condition of (left) weak current (4 cm/s) and (right) strong current (26 cm/s).
